1 **Predictive value of sudden olfactory loss in the diagnosis of COVID-19**

2

3 Authors: Antje Haehner, MD PhD<sup>1\*</sup>, Julia Draf, MD<sup>1</sup>, Sarah Dräger, MD<sup>2</sup>, Katja de With,  
4 MD PhD<sup>2</sup>, Thomas Hummel, MD PhD<sup>1</sup>

5

6 Affiliation: <sup>1</sup> Smell & Taste Clinic, Department of Otorhinolaryngology, TU Dresden, Dresden,  
7 Germany

8 <sup>2</sup> Division of Infectious Diseases, TU Dresden, Dresden, Germany

9

10

11 **Short title:** Olfactory loss in the diagnosis of COVID-19

12

13 **Corresponding Author:** Antje Haehner, M.D., Ph.D., Smell & Taste Clinic, Department of  
14 Otorhinolaryngology, TU Dresden, 01307 Dresden, Germany; phone +49-351-458-2118, fax +49-  
15 351-458-4326, [antje.haehner@uniklinikum-dresden.de](mailto:antje.haehner@uniklinikum-dresden.de)

16

17 **Number of Tables:** 1

18 **Number of Figures:** 1

19 **Word count:** 1421

20 **Keywords:** COVID-19, SARS-CoV-2, smell, olfactory loss, diagnostic accuracy

1 **Abstract**

2 **Introduction:** Recent reports suggest that sudden smell loss might be a symptom of SARS-CoV-2  
3 infection. The aim of this study was to investigate the frequency of olfactory loss in an out-patient  
4 population who presented to a coronavirus testing center during a 2-week period and to evaluate the  
5 diagnostic value of the symptom “sudden smell loss” for screening procedures.

6 **Methods:** In this cross-sectional controlled cohort study, 500 patients who presented with  
7 symptoms of a common cold to a corona testing center and fulfilled corona testing criteria,  
8 completed a standardized diagnostic questionnaire which included the patients’ main symptoms,  
9 time course and an additional self-assessment of the patients’ current smell, taste function and nasal  
10 breathing compared to the level before onset of symptoms.

11 **Results:** Out of the 500 patients, 69 presented with olfactory loss. Twenty-two of them  
12 subsequently tested positive for SARS-CoV-2. Only twelve out of the patients without olfactory  
13 loss tested positive, resulting in a frequency of 64.7% for the symptom “sudden smell loss” in  
14 COVID-19 patients. Compared to COVID-19 patients without smell loss, they were significantly  
15 younger and less severely affected. Changes in nasal airflow were significantly more pronounced in  
16 SARS-CoV-2 negative patients with olfactory complaints compared to the patients with smell loss  
17 who were tested positive for SARS-CoV-2. By excluding patients with a blocked nose, the  
18 symptom “sudden smell loss” can be attested a high specificity (97%) and a sensitivity of 65% with  
19 a PPV of 63% and NPV of 97% for COVID-19.

20 **Conclusion:** Considering the high frequency of smell loss in non-hospitalized COVID-19 patients,  
21 acute olfactory impairment should be included in the WHO symptoms list and should be recognized  
22 as an early symptom of the disease. In contrast to other acute viral smell impairment, COVID-19  
23 associated smell loss seems to be only rarely accompanied by a severely blocked nose.

24

## 1 **Introduction**

2 Viral upper respiratory tract infections (URTI) are one of the most common causes of olfactory loss.  
3 Together with rhinoviruses, adeno-, influenza-, and parainfluenza viruses, coronaviruses have long  
4 been known to account for at least 70% of common colds [1]. Compared to other respiratory  
5 viruses however, the frequency of reported olfactory disorders in coronavirus infections was lower  
6 so far and has never been a serious health issue [2,3,4].  
7 During an acute URTI, nasal congestion and rhinorrhea are commonly accompanied by a temporary  
8 smell loss of varying severity. Significant olfactory loss without rhinitic symptoms however, is  
9 comparatively rare and points towards damage of the olfactory epithelium. URTI-associated smell  
10 loss typically occurs after the fifth decade of life and becomes apparent to the patients several days  
11 after onset of the cold [5]. According to a number of anecdotal reports and very few published  
12 studies, a different pattern is seen in patients with severe acute respiratory syndrome coronavirus 2  
13 (SARS-CoV-2) infection. Smell and/or taste loss have been observed in 5-80% of these patients  
14 [6,7], sometimes as the only apparent symptom, at a younger age, and a very early stage of the  
15 disease. The diagnostic accuracy of this symptom is controversially discussed considering the fact  
16 that more than 200 viruses are known to cause URTIs with a subsequent olfactory loss.  
17 The aim of this study was to investigate the frequency of olfactory loss in an out-patient population  
18 who presented to a coronavirus testing center during a 2-week period and to evaluate the diagnostic  
19 value of this symptom for screening procedures.

20

## 21 **Material and Methods**

22 All patients who presented to the coronavirus testing center at the University hospital Dresden  
23 routinely received a standardized diagnostic questionnaire which included the patients' main  
24 symptoms, time course and an additional self-assessment of the patients' current smell, taste  
25 function and nasal breathing compared to the level before onset of symptoms. The patients had to

1 indicate whether they experienced loss of smell and/or taste (yes vs. no). For quantifying  
2 olfactory/gustatory function and nasal breathing, a visual analogue scale (VAS) with its extreme left  
3 of the scale defined as "no function" (0 units), and the extreme right of the scale defined as highest  
4 function possible ("extremely good"- 10 units) was used.

5 Out of 620 patients who fully completed the diagnostic questionnaire, 500 met the criteria for  
6 SARS-CoV-2 testing and throat swabs were collected according to WHO recommendations [8]. In  
7 34 patients (6.8%), the diagnosis of SARS-CoV-2 infection was confirmed by means of a positive  
8 RT-PCR test.

9

## 10 **Results**

### 11 *Study population*

12 Out of the 500 patients (mean age, 41.3 years; range, 18-86 years) who presented with symptoms of  
13 a common cold (mean duration, 5.8 days; range, 1-32 days) and fulfilled corona testing criteria,  
14 45.4% were male and 54.6% female. Main symptoms were: cough (76.8%), sore throat (64.8%),  
15 rhinorrhea (55.2%), myalgia (40.0%), dyspnea (33.4%), and fever (20.8%). Sixty-nine patients  
16 (13.8%) reported sudden smell and/or taste loss.

17

### 18 *COVID-19 patients*

19 Out of the 34 patients who were tested positive for SARS-CoV-2, 22 (64.7%) complained about  
20 sudden smell and/or taste loss. The chemosensory loss started 1-2 days before other symptoms in  
21 one patient, at the same time in four patients and 1-7 days after in 14 patients; 3 patients were not  
22 sure about the smell loss onset. COVID 19 patients with olfactory loss were significantly younger  
23 than COVID-19 patients without smell loss ( $p=0.04$ ) and had less severe symptoms (Table 1).  
24 Smell loss in COVID 19 patients was characterized by a severe loss of function from an average of

1 8.8 to 2 and minor changes in nasal breathing from an average of 8.4 to 7.3, as rated on the 10 point  
2 VAS scales. Only 14 patients complained about rhinorrhea.

3 While only one patient complained about isolated taste loss, the majority of patients reported either  
4 combined smell and taste loss, or smell loss only.

5

### 6 ***Patients with smell loss without SARS-CoV-2 infection***

7 Four hundred sixty six patients were tested negative for SARS-CoV-2, 47 out of them (10.1%)  
8 reported disorder-associated smell loss. Olfactory impairment started 1-14 days after the other  
9 symptoms had begun and was characterized by both severe loss of function (mean value, 8.8 to 3.4)  
10 and impaired nasal breathing (mean value, 8.5 to 3.6) as rated on the 10-point VAS scale. The  
11 majority of these patients (80.9%) suffered from rhinorrhea (Table 1).

12 Disease-associated changes in nasal airflow were significantly more pronounced in the 47 SARS-  
13 CoV-2 negative patients with olfactory complaints compared to the 22 patients with smell loss who  
14 were tested positive for SARS-CoV-2 ( $p<0.001$ ) (Figure 1). In contrast, changes in olfactory  
15 function were rated more severe in the latter group ( $p=0.023$ ).

16

### 17 ***Predictive value (PV)***

18 Using our data of an out-patient population, the sole symptom “smell loss” had the following  
19 diagnostic characteristics: 65% sensitivity, 90% specificity, 32% positive predictive value (PPV),  
20 and 97% negative predictive value (NPV). Taking into account the low frequency of sinusal  
21 symptoms in COVID-19 patients and excluding those with a blocked nose from the false positive  
22 sample however, positive PV increased to 63% and specificity to 97%.

23

24

### 25 **Discussion**

1 In this large URTI patient cohort study of a coronavirus testing center, we found that 13% of  
2 patients reported sudden olfactory loss. Out of these patients, 32% were subsequently tested  
3 positive for SARS-CoV-2. On the other hand, 2.8% of the patients without olfactory loss were  
4 tested positive.

5 In this out-patient sample, 64.7% of COVID-19 patients observed smell and/or taste loss early or  
6 even before other symptoms started. Compared to COVID-19 patients without smell loss they were  
7 significantly younger and less severely affected. In contrast to other acute viral smell impairment,  
8 COVID-19 associated smell loss seems to be only rarely accompanied by a severely blocked nose  
9 and thus the effect on olfaction may be independent of nasal congestion. By excluding patients with  
10 a blocked nose, the symptom “sudden smell loss” can be attested a high specificity (97%) and  
11 sensitivity of 65% with a PPV of 63% and NPV of 97% for COVID-19.

12 Thus, considering the high frequency of smell loss in non-hospitalized COVID-19 patients, acute  
13 olfactory impairment should be included in the WHO symptoms list and should be recognized as an  
14 early symptom of the disease. It also suggests the need for an exhaustive olfactory and gustatory  
15 follow-up of these patients in order to assess the extent of the olfactory loss and the significance of  
16 the chemosensory loss in terms of the prognosis of the patients.

17

18

19

20

21

22

23

24

25

1 **Statement of Ethics**

2 Investigations were performed according to the Guidelines for Biomedical Studies Involving  
3 Human Subjects (“Helsinki Declaration”). The protocol was approved by the Ethics Committee of  
4 the Medical Faculty of the TU Dresden (EK-115032020) and all subjects provided written informed  
5 consent.

6

7 **Disclosure Statement**

8 The authors declare no potential conflicts of interest with respect to the research, authorship, and/or  
9 publication of this article.

10

11 **Funding Sources**

12 There is no sponsorship or funding arrangement related to this research.

13

14

## 1   **References**

- 2       1.   Heikkinen T, Jarvinen A. The common cold. *Lancet* 2003;361:51–9.
- 3       2.   Sugiura M, Aiba T, Mori J, Nakai Y. An epidemiological study of postviral olfactory  
4       disorder. *Acta Otolaryngol Suppl.* 1998;538:191-6.
- 5       3.   Konstantinidis I, Haehner A, Frasnelli J, Reden J, Quante G, Damm M, et al. Post-infectious  
6       olfactory dysfunction exhibits a seasonal pattern. *Rhinology* 2006;44(2):135-9.
- 7       4.   Suzuki M, Saito K, Min WP, Vladau C, Toida K, Itoh H, et al. Identification of viruses in  
8       patients with postviral olfactory dysfunction. *Laryngoscope* 2007;117(2):272-7.
- 9       5.   Hummel T, Whitcroft KL, Andrews P, Altundag A, Cinghi C, Costanzo RM, et al. Position  
10       Paper on Olfactory Dysfunction. *Rhinol Suppl.* 2017;54(26):1-30.
- 11      6.   Mao L, Wang M, Chen S, Hu Y, Chen S, He Q, et al. Neurological manifestations of  
12       hospitalized patients with COVID-19 in Wuhan, China. *JAMA Neurol.* 2020 Apr 10. doi:  
13       10.1001/jamaneurol.2020.1127. [Epub ahead of print]
- 14      7.   Lechien JR, Chiesa-Estomba CM, De Siaty DR, Horoi M, Le Bon SD, Rodriguez A, et al.  
15       Olfactory and gustatory dysfunctions as a clinical presentation of mild-to-moderate forms of  
16       the coronavirus disease (COVID-19): a multicenter European study. *Eur Arch*  
17       *Otorhinolaryngol.* 2020 Apr 6. doi: 10.1007/s00405-020-05965-1. [Epub ahead of print]
- 18      8.   <https://www.who.int/emergencies/diseases/novel-coronavirus-2019/technical-guidance>.  
19       Assessed April 6, 2020

20

21

22

23



- 1 **Table 1** Patient characteristics.
- 2 COVID-19 patients with (correct) and without olfactory loss (false negative) and SARS-CoV-2-
- 3 negative-patients with smell loss (false positive) out of a total patient population of n=500

|                                                    | <b>correct</b><br><b>(n=22)</b> | <b>false negative</b><br><b>(n=12)</b> | <b>false positive</b><br><b>(n=47)</b> |
|----------------------------------------------------|---------------------------------|----------------------------------------|----------------------------------------|
| Gender female                                      | 54.5%                           | 33.3%                                  | 65.2%                                  |
| Age (M±SD), years                                  | 38.6 ± 12.4                     | 47.9 ± 10.8                            | 39.3±12.4                              |
| Symptoms onset before testing (M±SD), days         | 5.5 ± 3.2                       | 4.3 ± 2.9                              | 7.0 ± 4.9                              |
| Smell/taste loss onset before testing (M±SD), days | 3.1 ± 3.3                       |                                        | 5.4 ± 3.8                              |
| Smell VAS score difference (M±SD)                  | -6.8 ± 2.3                      | 0                                      | -5.3 ± 1.9                             |
| Nasal breathing VAS score difference (M±SD)        | -1.1 ± 1.6                      | -0.6 ± 0.9                             | -4.9 ± 2.4                             |
| Cough                                              | 81.0%                           | 75.0%                                  | 91.5%                                  |
| Sore throat                                        | 42.9%                           | 58.3%                                  | 83.0%                                  |
| Dyspnea                                            | 19.0%                           | 25.0%                                  | 59.6%                                  |
| Fever                                              | 19.0%                           | 58.3%                                  | 23.4%                                  |
| Rhinorrhea                                         | 45.5%                           | 33.3%                                  | 80.9%                                  |
| Myalgia                                            | 38.1%                           | 50.0%                                  | 55.3%                                  |

1 **Figure 1** Change in self-rated olfactory function and nasal breathing compared to the  
2 level before disease in SARS-CoV-2-positive (correct) and in SARS-CoV-2-  
3 negative-patients with smell loss (false positive)

4

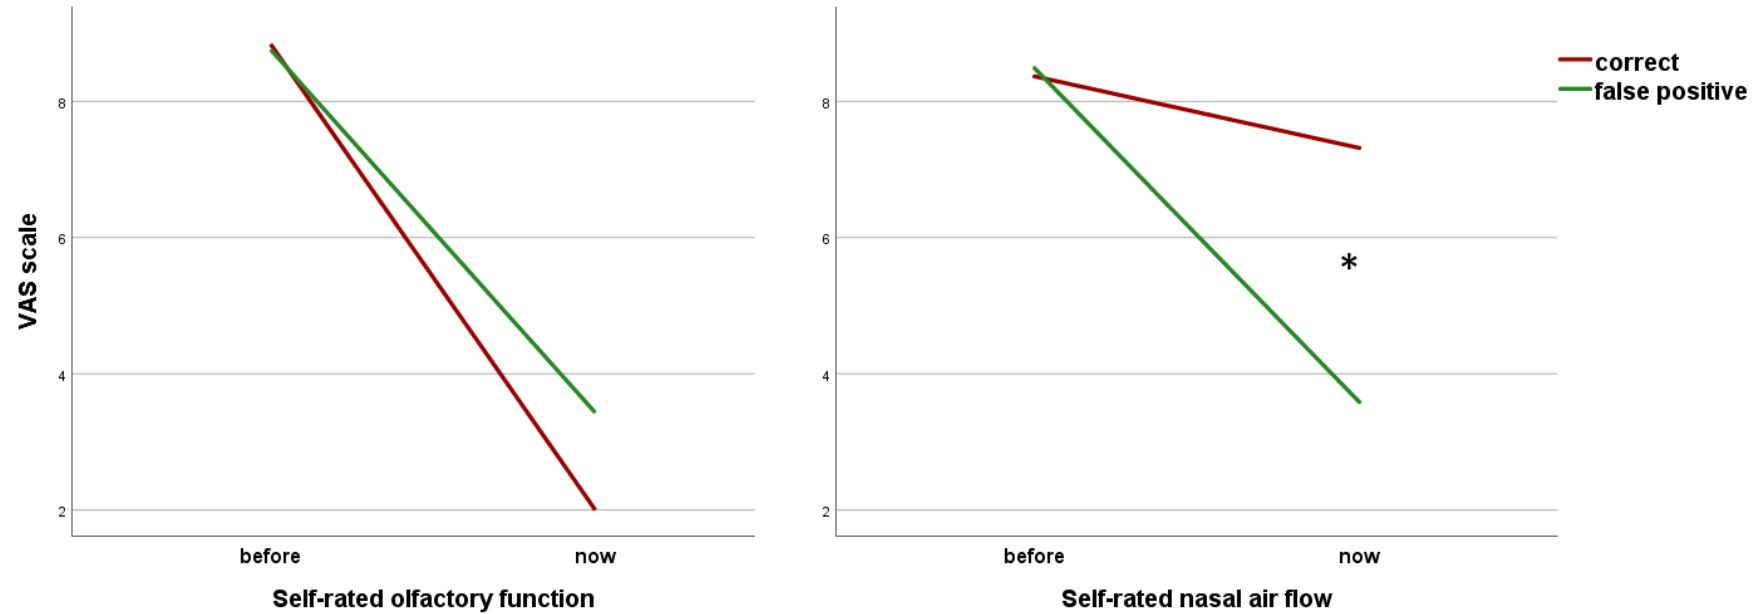

Figure 1. Change in self-rated olfactory function and nasal breathing compared to the level before disease in SARS-CoV-2-positive (correct) and in SARS-CoV-2-negative-patients with smell loss (false positive)
